# Supplementary material
Source: publisher site journal article supplement (https://www.degruyterbrill.com/publication/isbn/9783110258110/downloadAsset/9783110258110_Contents.pdf)
Supplement: Supplementary file 1 [file 9783110258110_Contents.pdf]

# Contents

|                        |   |
|------------------------|---|
| ISTVÁN KEUL            |   |
| Introduction . . . . . | 1 |

## PART I South Asia

|                                                                                                                                                                                  |     |
|----------------------------------------------------------------------------------------------------------------------------------------------------------------------------------|-----|
| ANNETTE WILKE                                                                                                                                                                    |     |
| Recoding the Natural and Animating the Imaginary. Kaula<br>Body-practices in the Paraśurāma-Kalpasūtra, Ritual<br>Transfers, and the Politics of Representation . . . . .        | 19  |
| RONALD M. DAVIDSON                                                                                                                                                               |     |
| Some Observations on an Uṣṇīṣa Abhiṣeka Rite in Atikūṭa's<br><i>Dhāraṇīsamgraha</i> . . . . .                                                                                    | 77  |
| SHAMAN HATLEY                                                                                                                                                                    |     |
| From <i>Mātṛ</i> to <i>Yoginī</i> . Continuity and Transformation in the<br>South Asian Cults of the Mother Goddesses . . . . .                                                  | 99  |
| GLEN ALEXANDER HAYES                                                                                                                                                             |     |
| Rivers to the Sky: Transformation, Metaphor, and Worldview<br>in Bengali Tantric Traditions . . . . .                                                                            | 131 |
| JUNE MCDANIEL                                                                                                                                                                    |     |
| Modern Bengali Śākta Tāntrikas: Ethnography, Image, and<br>Stereotype . . . . .                                                                                                  | 147 |
| XENIA ZEILER                                                                                                                                                                     |     |
| Transformations in the Textual Tradition of Dhūmāvati.<br>Changes in the Reception of the Tantric Mahāvidyā-Goddess<br>in Ritual, Function, Iconography, and Mythology . . . . . | 165 |
| ISTVÁN KEUL                                                                                                                                                                      |     |
| Reconnecting to What? Imagined Continuities and Discursive<br>Overlaps at Tantrapīṭhas in Central and Eastern India . . . . .                                                    | 195 |

LORILIAI BIERNACKI

- The Absent Mother and Bodied Speech: Psychology and  
Gender in Late Medieval Tantra . . . . . 215

## PART II

## Mongolia, Tibet, and China

KARÉNINA KOLLMAR-PAULENZ

- Embodying the Dharma: The Buddhist Way into Mongolia . . . . 239

GEOFFREY SAMUEL

- Amitāyus and the Development of Tantric Practices for  
Longevity and Health in Tibet . . . . . 263

MARTIN LEHNERT

- Ritual Expertise and Imperial Sovereignty: Some Remarks on  
Tantric Ritual Pragmatics in Medieval China . . . . . 287

CHARLES D. ORZECH

- The Trouble with Tantra in China: Reflections on Method  
and History . . . . . 303

## PART III

## Japan

LUCIA DOLCE

- Taimitsu Rituals in Medieval Japan: Sectarian Competition  
and the Dynamics of Tantric Performance . . . . . 329

RICHARD K. PAYNE

- Conversions of Tantric Buddhist Ritual: The Yoshida Shintō  
*Jūbachishintō* Ritual . . . . . 365

BERNARD FAURE

- The Impact of Tantrism on Japanese Religious Traditions:  
The Cult of the Three Devas . . . . . 399

**PART IV**  
**... and Beyond**

KATJA RAKOW  
 Kālacakra in Transition: From the Apocalypse to the  
 Promotion of World Peace ..... 413

JEFFREY J. KRIPAL  
 Remembering Ourselves: On Some Countercultural Echoes of  
 Contemporary Tantric Studies ..... 435

HUGH B. URBAN  
 Tantra, American Style: From the Path of Power to the Yoga  
 of Sex ..... 457

KENNET GRANHOLM  
 The Serpent Rises in the West: Positive Orientalism and  
 Reinterpretation of Tantra in the Western Left-Hand Path ..... 495

Notes on Contributors ..... 521

Index ..... 525
